# Supplementary material
Source: Research Square preprint supplement (doi:10.21203/rs.3.rs-9145643/v1)
Supplement: Supplementary file 1 [file b4f7713b87272bdad7f760dd.docx]

**A Novel Cluster-Based Multinomial Logit Modeling for Crash Severity Prediction in Collisions Involving Automated EV-Only Manufacturer (AEVOM) Vehicles**

**Declaration of Competing Interest**

The authors declare that they have no known competing financial interests or personal relationships that could have appeared to influence the work reported in this paper.
