# Supplementary material
Source: Research Square preprint supplement (doi:10.21203/rs.3.rs-9145643/v1)
Supplement: Supplementary file 2 [file ea2975012585bc7d144f559b.docx]

**A Novel Cluster-Based Multinomial Logit Modeling for Crash Severity Prediction in Collisions Involving Automated EV-Only Manufacturer (AEVOM) Vehicles**

**Credit Author Statement**

**1. Tausif Islam Chowdhury**

- **Conceptualization:** Led the conceptual framework and research design of the study.
- **Methodology:** Developed and applied methodology.
- **Formal Analysis:** Performed analyses.
- **Writing – Original Draft:** Prepared the initial manuscript text, figures, and tables.
- **Writing – Review & Editing:** Revised and refined the manuscript based on co-author feedback.

**2. Swastika Barua**

- **Writing – Original Draft:** Assisted in preparing the initial manuscript.
- **Writing – Review & Editing:** Provided critical review and revision of the manuscript.

**3. Sharif Ahmed Rafat**

- **Writing – Original Draft:** Assisted in preparing the initial manuscript.
- **Writing – Review & Editing:** Revised and refined the manuscript based on co-author feedback.

**4. Shriyank Somvanshi**

- **Writing – Original Draft:** Assisted in preparing the initial manuscript.
- **Writing – Review & Editing:** Revised and refined the manuscript based on co-author feedback.

**5. Subasish Das, Ph.D.**

- **Conceptualization:** Assisted in framing research objectives and methodological approach.
- **Supervision:** Provided oversight and guidance throughout the research process.
- **Writing – Review & Editing:** Contributed to manuscript editing and critical revision.

**Funding**

No external funding was received to support this research.

**Ethical Approval**

This research did not involve human participants or animals and therefore did not require ethical approval.
